1 **The CXCR6/CXCL16 axis links inflamm-aging to disease severity in**  
2 **COVID-19 patients**

3

4 Daniel J. Payne<sup>1\*</sup>, Surita Dalal<sup>1</sup>, Richard Leach<sup>1</sup>, Richard Parker<sup>1</sup>, Stephen  
5 Griffin<sup>2</sup>, Clive S. McKimmie<sup>2</sup>, Graham P. Cook<sup>2</sup>, Stephen J. Richards<sup>2</sup>,  
6 Peter Hillmen<sup>1</sup>, Talha Munir<sup>1</sup>, Louise Arnold<sup>1</sup>, Kathryn Riley<sup>1</sup>, Claire  
7 McKinley<sup>2</sup>, Sandra Place<sup>1</sup>, Richard L. Baretto<sup>4, 5</sup>, Darren J. Newton<sup>2</sup>

8

9 <sup>1</sup>*University Hospitals of Leeds NHS Trust, Leeds, UK, <sup>2</sup>Division of Haematology and*  
10 *Immunology, Leeds Institute of Medical Research, University of Leeds, Leeds, UK,*

11 <sup>4</sup>*Department of Immunology, University Hospitals of Birmingham NHS Trust,*

12 *Birmingham, UK, <sup>5</sup>Department of Immunology, University Hospitals of Coventry and*

13 *Warwickshire NHS Trust, Coventry, UK*

14

15 \*Corresponding author:

16 Mr D Payne

17 Consultant Clinical Scientist

18 University Hospitals of Leeds

19 St James Hospital

20 Leeds UK

21 [danielpayne@nhs.net](mailto:danielpayne@nhs.net)

22

23 The authors have declared that no conflict of interest exists.

24 **Abstract**

25 Advancing age and chronic health conditions, significant risk factors for severe  
26 COVID-19, are associated with a pro-inflammatory state, termed inflamm-aging.  
27 CXCR6<sup>+</sup> T cells are known to traffic to the lung and have been reported to increase with  
28 age. The ligand of CXCR6, CXCL16, is constitutively expressed in the lung and  
29 upregulated during inflammatory responses and the CXCR6/CXCL16 axis is associated  
30 with severe lung disease and pneumonia. Genome-wide association studies have also  
31 recently identified 3p21.31, encompassing the *CXCR6* gene, as a susceptibility locus for  
32 severe COVID-19. We assessed numbers T cells expressing the chemokine receptor  
33 CXCR6 and plasma levels of CXCL16, in control and COVID-19 patients. Results  
34 demonstrated that circulating CD8<sup>+</sup>CXCR6<sup>+</sup> T cells were significantly elevated with  
35 advancing age, yet virtually absent in patients with severe COVID-19. Peripheral levels  
36 of CXCL16 were significantly upregulated in severe COVID-19 patients compared to  
37 either mild COVID-19 patients or SARS-CoV-2 negative controls. This study supports  
38 a significant role of the CXCR6/CXCL16 axis in the immunopathogenesis of severe  
39 COVID-19.

40

41

## 42 **Introduction**

43 Coronavirus disease 2019 (COVID-19), caused by infection with severe acute  
44 respiratory syndrome coronavirus-type 2 (SARS-CoV-2), encompasses clinical  
45 phenotypes ranging from asymptomatic infection, through to severe disease and death.  
46 The more severe end of this spectrum is often associated with respiratory pathology (1,  
47 2). It is well established that the course of any infection is dependent on a number of  
48 variables including pathogen virulence, environmental and host factors. The latter  
49 includes variation in the immune response driven by genetics, age and the presence of  
50 co-morbidities. SARS-CoV-2 infection induces both innate and adaptive immunity (3)  
51 and severe COVID-19 is associated with exaggerated T cell responses producing  
52 increased levels of pro-inflammatory cytokines including IL-6, TNF- $\alpha$ , and IL-1 (4, 5).  
53 This aggressive hyper-inflammatory state results in significant lung damage and high  
54 mortality (4). Post-mortem studies have shown both lymphocyte and neutrophil lung  
55 infiltration, indicating that migration of pro-inflammatory cells into the lung is a key  
56 step in the pathology and outcome of this infection (6, 7). Immunomodulatory therapies,  
57 including the anti-IL-6 monoclonal antibody tocilizumab and the corticosteroid  
58 dexamethasone, may improve outcomes, highlighting the importance of inflammatory  
59 processes in COVID-19 pathology (8, 9).

60

61 Current epidemiological studies have identified advancing age, chronic health  
62 conditions, such as diabetes and obesity, and certain ethnicities as risk factors for more  
63 severe disease (10). Advancing age has been strongly associated with a pro-  
64 inflammatory immune phenotype, so-called inflamm-aging, where T cells acquire a  
65 more innate NK cell-like pro-inflammatory phenotype associated with upregulation of  
66 markers of both T cell exhaustion and senescence (11). Furthermore, increased  
67 expression of chemokine receptors, including CXCR6 on T cells, has been

68 demonstrated in aging animal models (12). The receptor CXCR6 (CD186) is expressed  
69 on activated T cells, NK cells, NKT cells and mucosal-associated invariant T (MAIT)  
70 cells (13-15).

71

72

## 73 **Results and Discussion**

74 We assessed the expression of CXCR6<sup>+</sup> on CD4<sup>+</sup> and CD8<sup>+</sup> T cells in consecutive blood  
75 samples to determine age-related differences and thereby support a potential role of  
76 these cells in inflamm-aging and justify further assessment in the pathogenesis of  
77 COVID-19 (16-18) (Figure 1).

78  
79 Patients over 65 years of age are known to have more severe outcomes in COVID-19  
80 (19). In keeping with the inflamm-aging hypothesis, we demonstrated a highly  
81 significant increase in CD8<sup>+</sup>CXCR6<sup>+</sup> T cells in the blood of patients aged over 65 years  
82 (n=96) compared to those aged under 65 years (n=137) (p<0.0001; Figure 1c). A  
83 progressive increase with advancing age was also observed (Rs 0.39, p<0.0001; Figure  
84 1d). There were lower proportions of CD4<sup>+</sup>CXCR6<sup>+</sup> T cells were observed compared to  
85 CD8<sup>+</sup>CXCR6<sup>+</sup> T cells and there were no significant age-related differences (Figure 1g  
86 and 1h). The increased frequency of CD8<sup>+</sup>CXCR6<sup>+</sup> T cells in the blood of older patients  
87 is supportive of a pro-inflammatory phenotype, potentially rendering this group  
88 susceptible to hyper-inflammatory immune responses associated with poor outcomes in  
89 COVID-19.

90  
91 Peripheral blood T lymphopenia has been identified as an immunological marker for  
92 SARS-CoV-1 and 2 infection with postulated mechanisms including immune-mediated  
93 destruction and trafficking to pathological sites (20-22). We analysed the absolute  
94 numbers and proportion of CD4<sup>+</sup> T cells, CD8<sup>+</sup> T cells and NK cells relative to total  
95 leucocytes in controls, mild and severe COVID-19 patients. There was an absolute and  
96 proportional reduction in CD4<sup>+</sup> and CD8<sup>+</sup> T cells in severe COVID-19 (Figure 2). This  
97 was more pronounced for CD8<sup>+</sup> T cells, with statistical significance in severe COVID-

98 19 compared to controls ( $p < 0.001$  and  $p < 0.0001$  for absolute number and proportion  
99 respectively). There was no significant difference in NK cells.

100

101 The receptor for SARS-CoV-2 is angiotensin converting enzyme 2 (ACE2) which is  
102 highly expressed on alveolar epithelial type II cells of the lower respiratory tract (23).

103 Membrane bound CXCL16 is constitutively expressed on bronchial epithelial cells and

104 is released in metalloprotease-dependent manner in an inflammatory environment,

105 producing a soluble form which is chemotactic for CXCR6<sup>+</sup> T-cells (24, 25). The

106 CXCR6/CXCL16 axis mediates homing of T cells to the lungs in disease (26-28) and

107 hyper-expression is associated with localised cellular injury (29-31). Murine studies

108 have demonstrated that this axis is involved in lung pathology associated with other

109 infections, including influenza, with antagonism resulting in reduced tissue

110 inflammation (26, 29).

111

112 CXCL16 is up-regulated during viral infections and mediates CD8<sup>+</sup>CXCR6<sup>+</sup> T-cell

113 recruitment (32, 33). Differential expression of *CXCR6* and *CXCL16* mRNA was

114 observed in severe COVID-19 compared to mild disease (34) and significant functional

115 polymorphisms in *CXCR6* are linked to viral control (35). Furthermore, in HIV

116 infection *CXCR6* polymorphisms have been linked with certain ethnicities associated

117 with more severe lung pathology and poorer outcomes (36). We compared peripheral

118 blood T cell populations in severe and mild COVID-19 to control samples. This

119 revealed that absolute CD8<sup>+</sup> CXCR6<sup>+</sup> T cell populations were significantly reduced in

120 both severe and mild COVID-19 patients compared to controls ( $p < 0.0001$  and  $p < 0.1$

121 respectively; Figure 3e), with significant reduction in absolute CD4<sup>+</sup> CXCR6<sup>+</sup> T cells

122 only between severe COVID-19 and controls ( $p < 0.001$ ; Figure 3g). Strikingly, both

123 CD4<sup>+</sup> and CD8<sup>+</sup> CXCR6<sup>+</sup> expressing T cells were present at extremely low proportions  
124 in the blood of severe COVID-19 patients (n=12).  
125  
126 Studies in COVID-19 patients suggest CXCR6 correlates directly with the proportion of  
127 MAIT cells and that this population is reduced in the peripheral blood in COVID-19  
128 (37). Killer cell lectin like receptor subfamily B, member 1 (CD161) is a C-type lectin  
129 receptor expressed on NK cells and a subset of T cells with both stimulatory and  
130 inhibitory functions. Expression of this marker was assessed on CD8<sup>+</sup> T cells as high  
131 levels of expression have been associated with MAIT cells and Th17 responses (38).  
132 We demonstrated that the majority of CD3<sup>+</sup> CD8<sup>+</sup> CXCR6<sup>+</sup> T cells in controls and mild  
133 COVID-19 cases were CD161<sup>++</sup> CD45RA<sup>-</sup> CD27<sup>+</sup> HLA-DR<sup>-</sup> CD57<sup>-</sup> (Figure 3 and  
134 Supplementary Figure 1) suggestive of an effector memory profile. In most cases these  
135 cells were also positive for CD56 and CD279 (see Supplementary Figure 1), consistent  
136 with either NKT cells, invariant T cells or mucosal-associated invariant T (MAIT) cells  
137 (13). CD8<sup>+</sup> CXCR6<sup>+</sup> CD161<sup>-</sup> T cells were present in lower numbers and there was no  
138 significant difference in this population between COVID-19 patients and controls.  
139 Proportions of both CD4<sup>+</sup> CXCR6<sup>+</sup> CD161<sup>++</sup> and CD4<sup>+</sup> CXCR6<sup>+</sup> CD161<sup>-</sup> T cells were  
140 lower compared to CD8<sup>+</sup> T cells. The extended phenotype of the CD4<sup>+</sup> CXCR6<sup>+</sup>  
141 CD161<sup>++</sup> is suggestive of an effector/central memory population (Supplementary Figure  
142 1).  
143  
144 Cells with this phenotype have been shown to exhibit tissue homing properties, with  
145 infiltrates described in inflammatory diseases including rheumatoid arthritis, psoriasis,  
146 multiple sclerosis and Crohn's disease (39). Levels of circulating and pancreatic MAIT-  
147 cells in type 1 diabetes mirror the findings of our MAIT-like cells in COVID-19. In type

148 1 diabetes high levels of circulating cells are present at diagnosis with numbers falling  
149 after 1 year with a concurrent increase in pancreatic numbers suggesting trafficking and  
150 a potential pathogenic role (40).

151

152 To further characterise the CXCR6/CXCL16 axis in the immunopathogenesis of  
153 COVID-19, plasma concentrations of CXCL16 from 28 COVID-19 patients and 12  
154 controls were assessed. CXCL16 was significantly elevated in severe COVID-19  
155 samples (n=10) when compared with mild COVID-19 (n=18,  $p < 0.0001$ ) or controls  
156 (n=12,  $p < 0.001$ ; Figure 4a), which contrasts with the findings of Liao *et al* (41) where  
157 *CXCL16* mRNA was more highly expressed in bronchoalveolar lavage fluid in mild  
158 disease, albeit with significantly fewer patient numbers in all groups. There was an  
159 inverse relationship between the concentration of blood CXCL16 and the proportion of  
160 CD8<sup>+</sup> and CD4<sup>+</sup> CXCR6<sup>+</sup> T cells in the blood in COVID-19 patients (Figures 4b and  
161 4c). This suggests trafficking of CXCR6<sup>+</sup> T cells to the lung drives a pro-inflammatory  
162 immunopathology in severe COVID-19, with these cells infiltrating into the tissue,  
163 which is supported by lower numbers of CD8<sup>+</sup> T cells reported in broncho-alveolar  
164 lavage in mild compared to severe COVID-19 patients (41). Furthermore, the  
165 CXCR6/CXCL16 axis has been implicated in both infective (influenza) and non-  
166 infective (sarcoidosis) inflammatory lung diseases (25, 26). However, this inverse  
167 relationship between CXCL16 levels and CXCR6<sup>+</sup> T cells and may also be explained by  
168 either CXCL16 binding to CXCR6 causing receptor internalisation, epitope masking or  
169 CXCL16-mediated T cell apoptosis.

170 Following infection with SARS-CoV-2, there is potential for pre-existing inflammatory  
171 CXCR6<sup>+</sup> populations, associated with either co-morbidity and/or inflamm-aging, to be  
172 recruited from the blood to the lungs mediated by CXCL16, resulting in more severe



173 disease (42). Similarly, in other diseases characterised by a T cell infiltrate, such as type  
174 1 diabetes, high expression of this chemokine receptor and ligand have been reported in  
175 pancreatic tissue where they play a role in inflammation (43).

176

177 CD8<sup>+</sup>CD161<sup>++</sup>CXCR6<sup>+</sup> T cells, have the capacity to be cytotoxic and express the  
178 transcription factor ROR $\gamma$ t, which is associated with a Th17-like phenotype and a pro-  
179 inflammatory cytokine profile (IFN- $\gamma$ , TNF- $\alpha$ , IL-17 and IL-22) along with expression  
180 of cytotoxic mediators such as granzyme (14, 44). These factors have all been shown to  
181 be significantly elevated in severe, but not mild COVID-19 patients, despite a more  
182 profound lymphopenia (45, 46). These cells have also been implicated in other lung  
183 infections, with IL-17 mediated inflammation and pathogenesis reported in patients with  
184 immune-mediated community-acquired pneumonia (47). A similar Th17 profile has  
185 been described in patients with COVID-19(48) along with a significant reduction in  
186 circulating CD161<sup>++</sup> cells (48, 49). It is likely that these CD161<sup>++</sup> cells are identical to  
187 the T cells identified in this study. As well as mediating chemotaxis of inflammatory  
188 cells, murine studies suggest that elevated levels of CXCL16 may directly contribute to  
189 lung injury through production of reactive oxygen species and compromised epithelial  
190 barrier integrity, with CXCL16 inhibitors protecting against lipopolysaccharide-  
191 mediated lung injury (29).

192

193 This study demonstrates an age-related increase in CD8<sup>+</sup>CXCR6<sup>+</sup> T cells consistent  
194 with inflamm-aging in humans and that more severe outcomes in COVID-19 associate  
195 with increased peripheral CXCL16 and reduced circulating CXCR6<sup>+</sup> T cells, suggesting  
196 an immunopathogenic role. This may have significant implications in the stratification  
197 of the risk for patients infected with SARS-CoV-2 and raises the possibility of novel

198 therapeutic agents targeting this axis in severe COVID-19. Studies on CXCR6  
199 expression on T-cells and levels of CXCL16 in dexamethasone and tocilizumab treated  
200 patients will provide further insight into the pathogenesis and putative mechanisms of  
201 therapy. This axis may also be relevant in other infections associated with lung  
202 pathology such as influenza.  
203  
204

205 **Methods**

206 *Samples*

207 *Consecutive samples:* CXCR6 expression was assessed on CD4+ and CD8+ T cells as  
208 part of routine diagnostics on samples taken between 30th March and 1st July 2020  
209 from patients not tested for SARS-CoV-2. Samples consisted of 233 peripheral blood  
210 (PB) aliquots, (age range 1 to 97 years, median 60; 135 male, 98 female).

211 *COVID-19 study samples:* With the exceptions of age and gender investigators were  
212 blinded to all other demographics due to ethical constraints. Samples were less than 24  
213 hours old and obtained from patients admitted to Leeds Teaching Hospitals NHS Trust  
214 between 7th April and 16th July 2020. Samples were collected from 52 patients: 1)  
215 (Mild), 20 samples from mild cases of COVID-19, defined by positive RT-PCR for  
216 SARS-CoV-2 and not requiring Intensive Care Unit (ITU) support (age range 20 to 90  
217 years, median 73; 13 males, 7 females. 2) (Severe) 12 samples from severe cases of  
218 COVID-19, defined by positive RT-PCR for SARS-CoV-2 and requiring ITU support  
219 (age range 44 to 82 years, median 64; 6 males, 6 females). 3) (Control) 20 control  
220 samples from patients with no features of COVID-19 and negative RT-PCR for SARS-  
221 CoV-2, 16/20 were not on ITU, 4/20 were on ITU (age range 20 to 91 years, median 57;  
222 11 males, 9 females). Flow cytometry was performed, and plasma extracted using  
223 standard methods and stored at -20°C. CXCL16 ELISA was performed on 40 samples  
224 (12 C [including 2 ITU patients], 10 S, 18 M).

225 *Flow cytometry*

226 Samples were analysed using 2 phenotyping panels (Supplementary Table 1).  
227 Consecutive sample analyses were performed using a FACS Canto II flow cytometer  
228 (BD Biosciences) verified through daily calibration with CS&T beads (BD Biosciences)

229 and 8 peak Rainbow beads (Spherotech) utilising a 7-parameter panel (CD8-FITC,  
230 CD16-PE, CD4-PerCP-Cy5.5, CD3-PE-Cy7, CD8-APC, CD45-APC-Cy7, CD186-  
231 BV421 [Becton Dickinson]). Samples from COVID-19 patients and controls were  
232 assessed on a Cytoflex LX cytometer (Beckman Coulter), verified through daily  
233 calibration with CytoFLEX Daily QC Fluorospheres (Beckman Coulter), using a 12-  
234 parameter panel (CD57-FITC, CD4-PE, CD161-PC7, CD8-KrO, CD279-PC5.5,  
235 CD45RA-A700, CD3-APC-A750 [Beckman Coulter] and CD56-BV605, CD45-PerCP,  
236 CD186-BV421, CD27-BV786, HLA-DR-BUV395 [Becton Dickinson]). A minimum of  
237 50,000 CD3<sup>+</sup> T cell events were assessed and analysed using standard methods. All  
238 analyses were only performed once due to the volume of sample available. Data was  
239 analysed with Kaluza Analysis software version 2.1 (Beckman Coulter) and Cytobank  
240 software (Beckman Coulter) Representative gating strategy can be seen in  
241 Supplementary figure 1.

#### 242 ***ELISA***

243 Plasma CXCL16 levels were measured in duplicate using a commercial ELISA  
244 (ThermoFisher Scientific), with a coefficient of variation of less than 10%, according to  
245 the manufacturer's specifications.

#### 246 ***Statistics***

247 Data was analysed with GraphPad Prism version 9.0.0 (GraphPad software).  
248 Categorical data was compared with Mann-Whitney statistical analyses. Spearman  
249 Rank and regression analysis was used to assess data correlation,  $p < 0.05$  was  
250 considered significant.

251 *Study approval*

252 Local and National ethical approval (IRAS: 284369) allowed collection of anonymised  
253 excess peripheral blood from patients tested for SARS-CoV-2 infection.

254

255 **Author contributions**

256 DP carried out the experiments, planned the study, analysed data, performed statistical  
257 analysis and wrote the manuscript. SD, RL acquired data. RP, SG, CM, GC, SR were  
258 involved in the design of the study. PH, TM, LA, KR, CM, SP were involved in the  
259 identification and collection of patient samples. RB and DN planned the study,  
260 interpreted the data and drafted the manuscript. All authors critically reviewed the  
261 manuscript.

262 **Acknowledgements**

263 We would like to thank the HMDS department, University Hospitals of Leeds NHS  
264 Trust for partial funding of this project and use of facilities. Additionally, we want to  
265 thank Alison Bell, Markus Kaymer and Michael Kapinski from Beckman Coulter, Bev  
266 Goward from BD Biosciences and ThermoFisher for support with reagents and technical  
267 assistance. We also like to thank Rachael Barlow, University of Leeds, for use of the  
268 ELISA plate reader, and Anne Gowing, Research and Innovation, University Hospitals  
269 of Leeds NHS Trust, who assisted with the ethics application process.  
270

271 **References**

272

- 273 1. Huang C, Wang Y, Li X, Ren L, Zhao J, Hu Y, et al. Clinical features of patients  
274 infected with 2019 novel coronavirus in Wuhan, China. *Lancet*.  
275 2020;395(10223):497-506.
- 276 2. Wu Z, and McGoogan JM. Characteristics of and Important Lessons From the  
277 Coronavirus Disease 2019 (COVID-19) Outbreak in China: Summary of a  
278 Report of 72314 Cases From the Chinese Center for Disease Control and  
279 Prevention. *JAMA*. 2020;323(13):1239-42.
- 280 3. Vabret N, Britton GJ, Gruber C, Hegde S, Kim J, Kuksin M, et al. Immunology of  
281 COVID-19: Current State of the Science. *Immunity*. 2020;52(6):910-41.
- 282 4. Soy M, Keser G, Atagunduz P, Tabak F, Atagunduz I, and Kayhan S. Cytokine  
283 storm in COVID-19: pathogenesis and overview of anti-inflammatory agents  
284 used in treatment. *Clin Rheumatol*. 2020;39(7):2085-94.
- 285 5. Wiersinga WJ, Rhodes A, Cheng AC, Peacock SJ, and Prescott HC.  
286 Pathophysiology, Transmission, Diagnosis, and Treatment of Coronavirus  
287 Disease 2019 (COVID-19): A Review. *JAMA*. 2020;324(8):782-93.
- 288 6. Hanley B, Lucas SB, Youd E, Swift B, and Osborn M. Autopsy in suspected  
289 COVID-19 cases. *J Clin Pathol*. 2020;73(5):239-42.
- 290 7. Borczuk AC, Salvatore SP, Seshan SV, Patel SS, Bussel JB, Mostyka M, et al.  
291 COVID-19 pulmonary pathology: a multi-institutional autopsy cohort from  
292 Italy and New York City. *Mod Pathol*. 2020;33(11):2156-68.
- 293 8. Guaraldi G, Meschiari M, Cozzi-Lepri A, Milic J, Tonelli R, Menozzi M, et al.  
294 Tocilizumab in patients with severe COVID-19: a retrospective cohort study.  
295 *Lancet Rheumatol*. 2020;2(8):e474-e84.
- 296 9. Group RC, Horby P, Lim WS, Emberson JR, Mafham M, Bell JL, et al.  
297 Dexamethasone in Hospitalized Patients with Covid-19 - Preliminary Report.  
298 *N Engl J Med*. 2020.
- 299 10. Petrilli CM, Jones SA, Yang J, Rajagopalan H, O'Donnell L, Chernyak Y, et al.  
300 Factors associated with hospital admission and critical illness among 5279  
301 people with coronavirus disease 2019 in New York City: prospective cohort  
302 study. *BMJ*. 2020;369:m1966.
- 303 11. Akbar AN, and Gilroy DW. Aging immunity may exacerbate COVID-19.  
304 *Science*. 2020;369(6501):256-7.
- 305 12. Lustig A, Carter A, Bertak D, Enika D, Vandanmagsar B, Wood W, et al.  
306 Transcriptome analysis of murine thymocytes reveals age-associated  
307 changes in thymic gene expression. *Int J Med Sci*. 2009;6(1):51-64.
- 308 13. Garner LC, Klenerman P, and Provine NM. Insights Into Mucosal-Associated  
309 Invariant T Cell Biology From Studies of Invariant Natural Killer T Cells. *Front*  
310 *Immunol*. 2018;9:1478.
- 311 14. Billerbeck E, Kang YH, Walker L, Lockstone H, Grafmueller S, Fleming V, et al.  
312 Analysis of CD161 expression on human CD8+ T cells defines a distinct  
313 functional subset with tissue-homing properties. *Proc Natl Acad Sci U S A*.  
314 2010;107(7):3006-11.
- 315 15. Dusseaux M, Martin E, Serriari N, Peguillet I, Premel V, Louis D, et al. Human  
316 MAIT cells are xenobiotic-resistant, tissue-targeted, CD161hi IL-17-secreting  
317 T cells. *Blood*. 2011;117(4):1250-9.

- 318 16. Meftahi GH, Jangravi Z, Sahraei H, and Bahari Z. The possible pathophysiology  
319 mechanism of cytokine storm in elderly adults with COVID-19 infection: the  
320 contribution of "inflamm-aging". *Inflamm Res.* 2020;69(9):825-39.
- 321 17. Cunha LL, Perazzio SF, Azzi J, Cravedi P, and Riella LV. Remodeling of the  
322 Immune Response With Aging: Immunosenescence and Its Potential Impact  
323 on COVID-19 Immune Response. *Front Immunol.* 2020;11:1748.
- 324 18. Bonafe M, Prattichizzo F, Giuliani A, Storci G, Sabbatinelli J, and Olivieri F.  
325 Inflamm-aging: Why older men are the most susceptible to SARS-CoV-2  
326 complicated outcomes. *Cytokine Growth Factor Rev.* 2020;53:33-7.
- 327 19. Yanez ND, Weiss NS, Romand JA, and Treggiari MM. COVID-19 mortality risk  
328 for older men and women. *BMC Public Health.* 2020;20(1):1742.
- 329 20. Diao B, Wang C, Tan Y, Chen X, Liu Y, Ning L, et al. Reduction and Functional  
330 Exhaustion of T Cells in Patients With Coronavirus Disease 2019 (COVID-19).  
331 *Front Immunol.* 2020;11:827.
- 332 21. Huang I, and Pranata R. Lymphopenia in severe coronavirus disease-2019  
333 (COVID-19): systematic review and meta-analysis. *J Intensive Care.*  
334 2020;8:36.
- 335 22. He Z, Zhao C, Dong Q, Zhuang H, Song S, Peng G, et al. Effects of severe acute  
336 respiratory syndrome (SARS) coronavirus infection on peripheral blood  
337 lymphocytes and their subsets. *Int J Infect Dis.* 2005;9(6):323-30.
- 338 23. Zhao Y, Zhao Z, Wang Y, Zhou Y, Ma Y, and Zuo W. Single-Cell RNA Expression  
339 Profiling of ACE2, the Receptor of SARS-CoV-2. *Am J Respir Crit Care Med.*  
340 2020;202(5):756-9.
- 341 24. Day C, Patel R, Guillen C, and Wardlaw AJ. The Chemokine CXCL16 is Highly  
342 and Constitutively Expressed by Human Bronchial Epithelial Cells. *Exp Lung*  
343 *Res.* 2009;35(4):272-83.
- 344 25. Morgan AJ, Guillen C, Symon FA, Huynh TT, Berry MA, Entwisle JJ, et al.  
345 Expression of CXCR6 and its ligand CXCL16 in the lung in health and disease.  
346 *Clin Exp Allergy.* 2005;35(12):1572-80.
- 347 26. Ashhurst AS, Flórido M, Lin LCW, Quan D, Armitage E, Stifter SA, et al. CXCR6-  
348 Deficiency Improves the Control of Pulmonary Mycobacterium tuberculosis  
349 and Influenza Infection Independent of T-Lymphocyte Recruitment to the  
350 Lungs. *Front Immunol.* 2019;10.
- 351 27. Nakayama T, Hieshima K, Izawa D, Tatsumi Y, Kanamaru A, and Yoshie O.  
352 Cutting edge: profile of chemokine receptor expression on human plasma  
353 cells accounts for their efficient recruitment to target tissues. *J Immunol.*  
354 2003;170(3):1136-40.
- 355 28. Wein AN, McMaster SR, Takamura S, Dunbar PR, Cartwright EK, Hayward SL,  
356 et al. CXCR6 regulates localization of tissue-resident memory CD8 T cells to  
357 the airways. *J Exp Med.* 2019;216(12):2748-62.
- 358 29. Tu GW, Ju MJ, Zheng YJ, Hao GW, Ma GG, Hou JY, et al. CXCL16/CXCR6 is  
359 involved in LPS-induced acute lung injury via P38 signalling. *J Cell Mol Med.*  
360 2019;23(8):5380-9.
- 361 30. Izquierdo MC, Martin-Cleary C, Fernandez-Fernandez B, Elewa U, Sanchez-  
362 Nino MD, Carrero JJ, et al. CXCL16 in kidney and cardiovascular injury.  
363 *Cytokine Growth Factor Rev.* 2014;25(3):317-25.
- 364 31. Zhang W, Hua T, Li J, Zheng L, Wang Y, Xu M, et al. CXCL16 is activated by p-  
365 JNK and is involved in H2O2-induced HK-2 cell injury via p-ERK signaling. *Am*  
366 *J Transl Res.* 2018;10(11):3723-32.



- 367 32. Steffen S, Abraham S, Herbig M, Schmidt F, Blau K, Meisterfeld S, et al. Toll-  
368 Like Receptor-Mediated Upregulation of CXCL16 in Psoriasis Orchestrates  
369 Neutrophil Activation. *J Invest Dermatol.* 2018;138(2):344-54.
- 370 33. Gunther C, Carballido-Perrig N, Kaesler S, Carballido JM, and Biedermann T.  
371 CXCL16 and CXCR6 are upregulated in psoriasis and mediate cutaneous  
372 recruitment of human CD8+ T cells. *J Invest Dermatol.* 2012;132(3 Pt 1):626-  
373 34.
- 374 34. Chua RL, Lukassen S, Trump S, Hennig BP, Wendisch D, Pott F, et al. COVID-  
375 19 severity correlates with airway epithelium-immune cell interactions  
376 identified by single-cell analysis. *Nat Biotechnol.* 2020;38(8):970-9.
- 377 35. Picton ACP, Paximadis M, Chaisson RE, Martinson NA, and Tiemessen CT.  
378 CXCR6 gene characterization in two ethnically distinct South African  
379 populations and association with viraemic disease control in HIV-1-infected  
380 black South African individuals. *Clin Immunol.* 2017;180:69-79.
- 381 36. Patel P, Hiam L, Sowemimo A, Devakumar D, and McKee M. Ethnicity and  
382 covid-19. *BMJ.* 2020;369:m2282.
- 383 37. Parrot T, Gorin JB, Ponzetta A, Maleki KT, Kammann T, Emgard J, et al. MAIT  
384 cell activation and dynamics associated with COVID-19 disease severity. *Sci*  
385 *Immunol.* 2020;5(51).
- 386 38. Fergusson JR, Huhn MH, Swadling L, Walker LJ, Kurioka A, Llibre A, et al.  
387 CD161(int)CD8+ T cells: a novel population of highly functional, memory  
388 CD8+ T cells enriched within the gut. *Mucosal Immunol.* 2016;9(2):401-13.
- 389 39. Chiba A, Murayama G, and Miyake S. Mucosal-Associated Invariant T Cells in  
390 Autoimmune Diseases. *Front Immunol.* 2018;9:1333.
- 391 40. Gazali AM, Schroderus AM, Nanto-Salonen K, Rintamaki R, Pihlajamaki J, Knip  
392 M, et al. Mucosal-associated invariant T cell alterations during the  
393 development of human type 1 diabetes. *Diabetologia.* 2020;63(11):2396-  
394 409.
- 395 41. Liao M, Liu Y, Yuan J, Wen Y, Xu G, Zhao J, et al. Single-cell landscape of  
396 bronchoalveolar immune cells in patients with COVID-19. *Nat Med.*  
397 2020;26(6):842-4.
- 398 42. Yu H, Yang A, Liu L, Mak JYW, Fairlie DP, and Cowley S. CXCL16 Stimulates  
399 Antigen-Induced MAIT Cell Accumulation but Trafficking During Lung  
400 Infection Is CXCR6-Independent. *Front Immunol.* 2020;11:1773.
- 401 43. Sandor AM, Jacobelli J, and Friedman RS. Immune cell trafficking to the islets  
402 during type 1 diabetes. *Clin Exp Immunol.* 2019;198(3):314-25.
- 403 44. Xiao X, and Cai J. Mucosal-Associated Invariant T Cells: New Insights into  
404 Antigen Recognition and Activation. *Front Immunol.* 2017;8:1540.
- 405 45. Kang CK, Han GC, Kim M, Kim G, Shin HM, Song KH, et al. Aberrant  
406 hyperactivation of cytotoxic T-cell as a potential determinant of COVID-19  
407 severity. *Int J Infect Dis.* 2020;97:313-21.
- 408 46. Jiang Y, Wei X, Guan J, Qin S, Wang Z, Lu H, et al. COVID-19 pneumonia: CD8(+)  
409 T and NK cells are decreased in number but compensatory increased in  
410 cytotoxic potential. *Clin Immunol.* 2020;218:108516.
- 411 47. Lu B, Liu M, Wang J, Fan H, Yang D, Zhang L, et al. IL-17 production by tissue-  
412 resident MAIT cells is locally induced in children with pneumonia. *Mucosal*  
413 *Immunol.* 2020;13(5):824-35.

- 414 48. De Biasi S, Meschiari M, Gibellini L, Bellinazzi C, Borella R, Fidanza L, et al.  
415 Marked T cell activation, senescence, exhaustion and skewing towards TH17  
416 in patients with COVID-19 pneumonia. *Nat Commun.* 2020;11(1):3434.  
417 49. Kuri-Cervantes L, Pampena MB, Meng W, Rosenfeld AM, Ittner CAG, Weisman  
418 AR, et al. Comprehensive mapping of immune perturbations associated with  
419 severe COVID-19. *Sci Immunol.* 2020;5(49).  
420

421 **Display items**

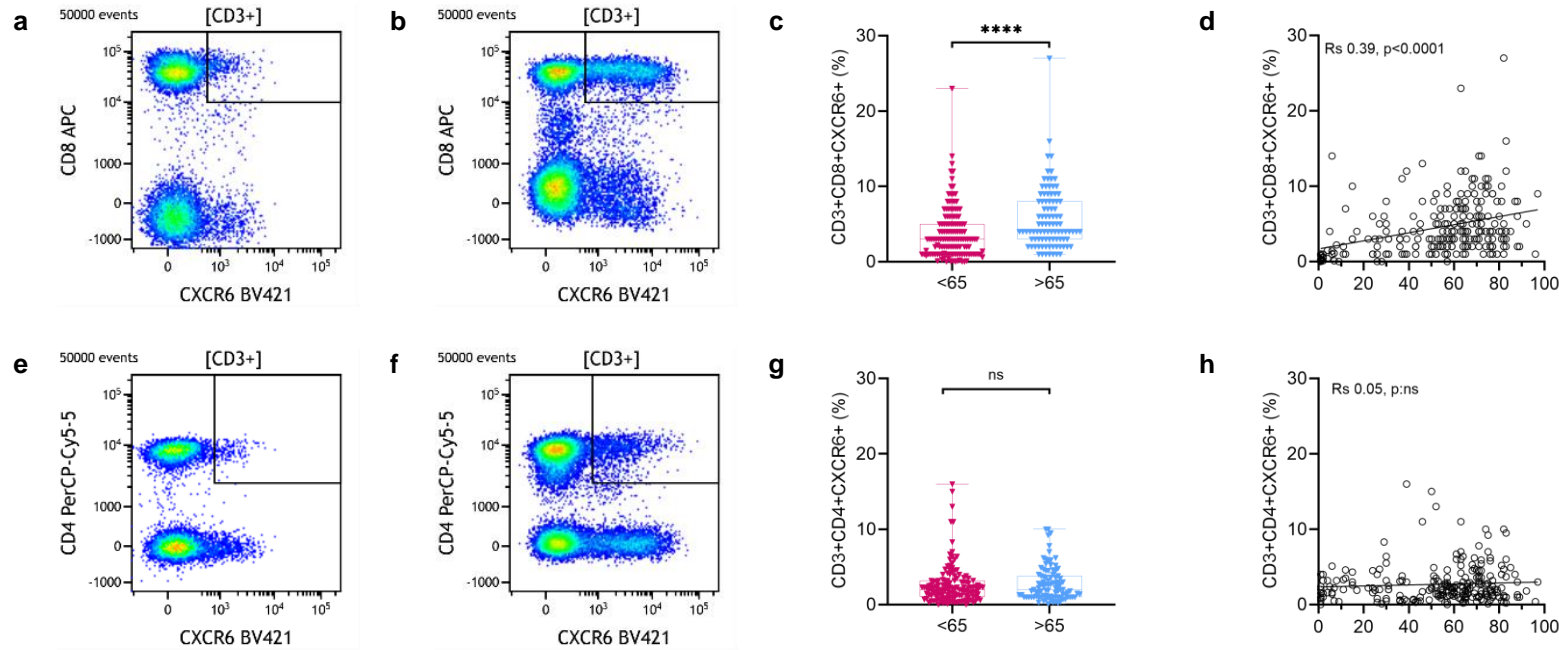

422 **Figure 1. Age-related percentage of CXCR6<sup>+</sup> T cells in consecutive samples**

423 SARS-CoV-2 status of these samples was undetermined. Data presented as a percentage of CD3<sup>+</sup> gated T cells.

424 Dot plots illustrate differences observed in proportion of CD3<sup>+</sup>CD8<sup>+</sup>CXCR6<sup>+</sup> cells **a**: 15 year old **b**: 83 year old. **c**: Levels of CD3<sup>+</sup>CD8<sup>+</sup>CXCR6<sup>+</sup> cells in peripheral  
 425 blood of different age groups (**<65**) <65 years old (n=137). (**>65**) >65 years old (n=96). Median, maximum, and minimum values shown. Mann Whitney was  
 426 used to compare populations, \*\*\*\* p<0.0001;. **d**: Correlation of CD3<sup>+</sup>CD8<sup>+</sup>CXCR6<sup>+</sup> with age in 233 peripheral blood samples. Spearman rank correlation: R<sub>s</sub>  
 427 0.39, p<0.0001, suggesting a trend to increase with age.

428 Dot plots illustrate differences observed in proportion of CD3<sup>+</sup>CD4<sup>+</sup>CXCR6<sup>+</sup> cells **e**: 15 year old and **f**: 83 year old. **g**: Levels of CD3<sup>+</sup>CD4<sup>+</sup>CXCR6<sup>+</sup> cells in  
 429 peripheral blood of different age groups (**<65**) <65 years old (n=137). (**>65**) >65 years old (n=96). Median, maximum, and minimum values shown. Mann Whitney  
 430 was used to compare populations, ns: not significant. **h**: Correlation of CD3<sup>+</sup>CD4<sup>+</sup>CXCR6<sup>+</sup> with age in 233 peripheral blood samples: R<sub>s</sub>0.05, p: ns.

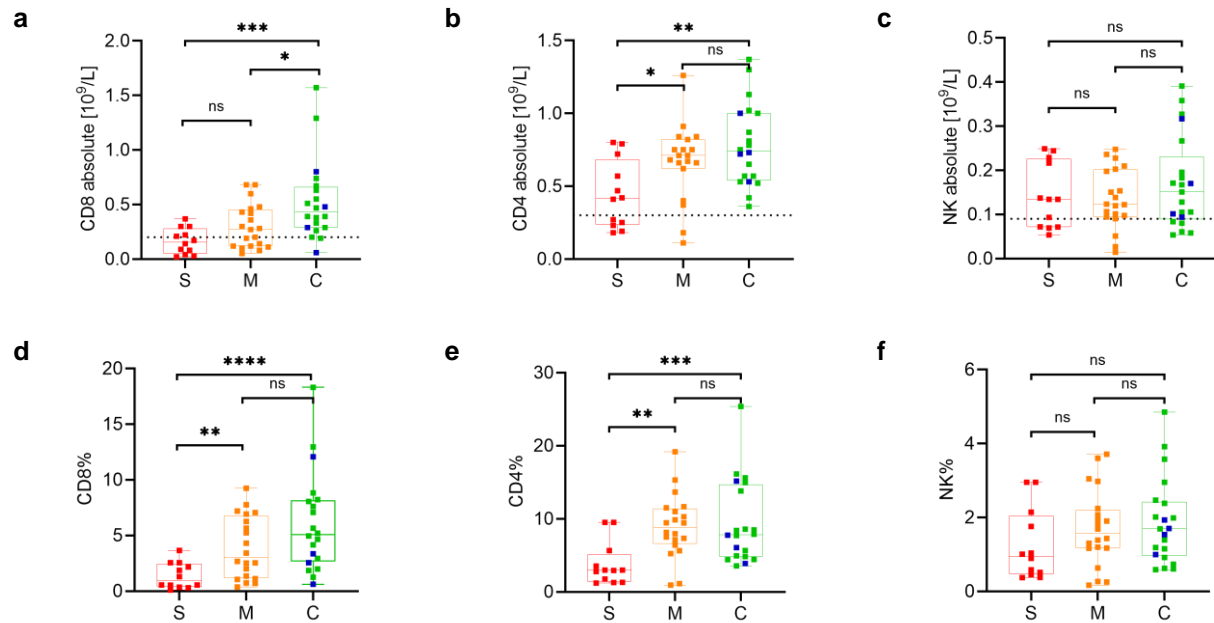

432 **Figure 2. Reduced absolute and total T-cell numbers in severe COVID-19 patients**  
 433 **(S)evere COVID-19;** SARS-CoV-2 RT-PCR positive patients on ITU (n=12, red). **(M)ild COVID-19;** SARS-CoV-2 RT-PCR positive patients non-ITU (n=20,  
 434 **(C)ontrols;** SARS-CoV-2 RT-PCR negative non-ITU (n=16, green). **on ITU** (n=4, blue). maximum, and minimum values shown, dotted line shows lower  
 435 end of absolute reference range. Mann Whitney was used to compare populations; \*\*\*\* p<0.0001 \*\*\* p<0.001 \*\* p<0.01 \* p<0.1 ns = not significant.  
 436 **a** and **d**: Significantly reduced absolute and percentage CD8<sup>+</sup> T cells in when comparing S to M or C. **b** and **e**: Significantly reduced absolute and percentage  
 437 CD4<sup>+</sup> T cells in when comparing S to M or C. **c** and **f**: No significant difference in NK cells was observed when comparing S, M to C.  
 438

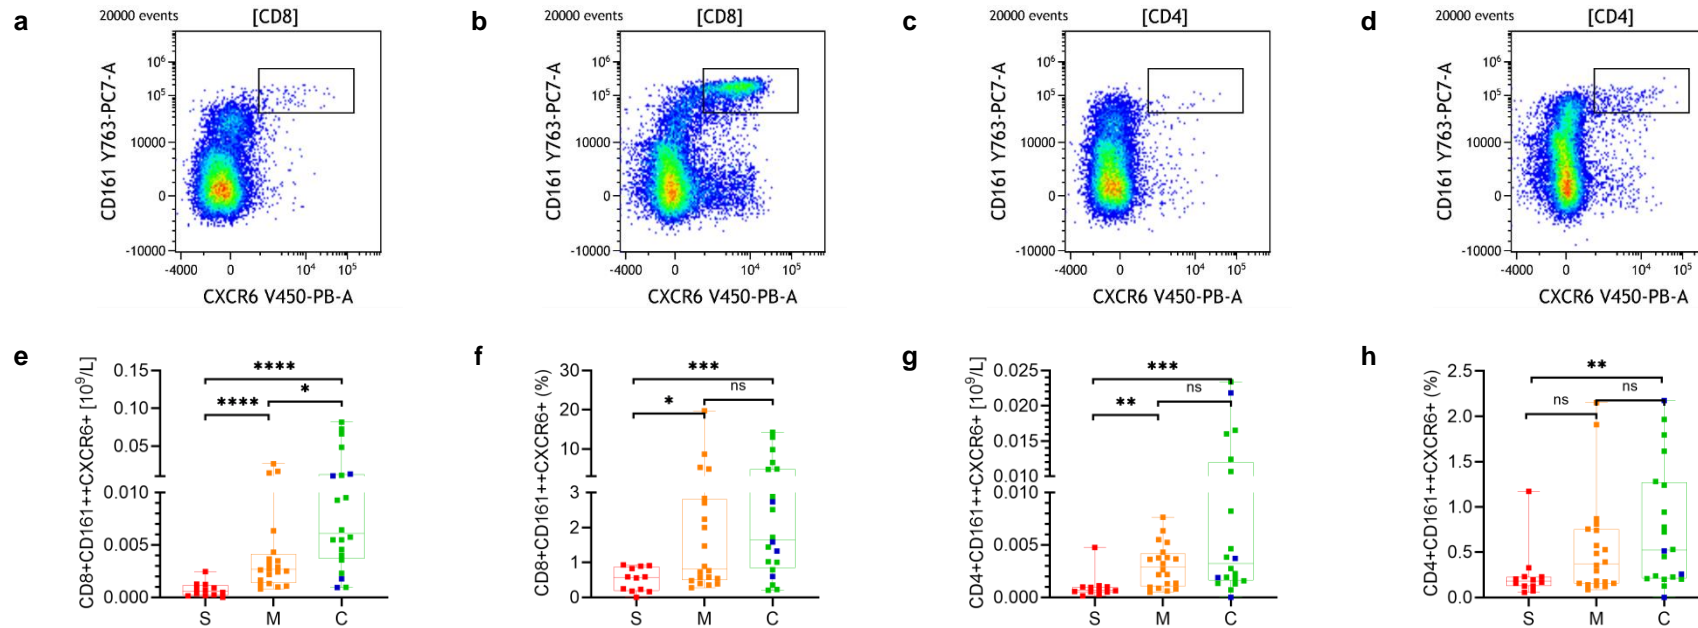

441 **Figure 3. Reduced CXCR6<sup>+</sup>T cells in severe COVID-19 patients**

442 Gated on CD3<sup>+</sup>CD8<sup>+</sup> T cells, **a**: illustrates reduced CXCR6<sup>+</sup>CD161<sup>++</sup> cells in severe COVID-19 when compared with **b**: control sample.

443 Gated on CD3<sup>+</sup>CD4<sup>+</sup> T cells, **c**: illustrates reduced CXCR6<sup>+</sup>CD161<sup>++</sup> cells in severe COVID-19 when compared with **d**: control sample.

444 **e**: Significantly reduced absolute and **f**: percentage of CD8<sup>+</sup>CD161<sup>++</sup>CXCR6<sup>+</sup> cells in severe COVID-19 compared to mild COVID-19 and controls. **e**: Significantly  
 445 reduced absolute and **f**: percentage of CD4<sup>+</sup>CD161<sup>++</sup>CXCR6<sup>+</sup> cells in severe COVID-19 compared to mild COVID-19 and controls. **(S)**evere COVID-19; SARS-  
 446 CoV-2 RT-PCR positive patients on ITU (n=12, red). **(M)**ild COVID-19; SARS-CoV-2 RT-PCR positive patients non-ITU (n=20, orange). **(C)**ontrols; SARS-CoV-  
 447 2 RT-PCR negative non-ITU (n = 16, green), on ITU (n=4, blue). Median, maximum, and minimum values shown. Mann Whitney was used to compare graphed  
 448 populations. \*\*\*\* p<0.0001 \*\*\* p<0.001 \*\* p<0.01 \* p<0.1 ns = not significant

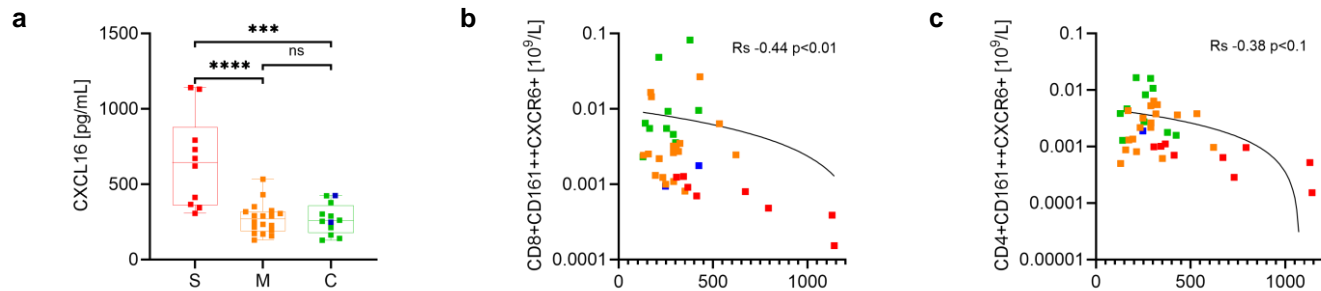

450 **Figure 4. Plasma concentrations of CXCL16 in COVID-19 compared with controls**

451 **a:** Median, maximum, and minimum values shown. **(S)evere COVID-19;** SARS-CoV-2 RT-PCR positive patients on ITU (n=10, red). **(M)ild COVID-19;** SARS-  
 452 CoV-2 RT-PCR positive patients non-ITU (n=18, orange). **(C)ontrols;** SARS-CoV-2 RT-PCR negative non-ITU (n=10, green). on ITU (n=2, blue). (\*\*\*\* p<0.0001  
 453 \*\*\* p<0.001 ns = not significant) Significantly increased levels of CXCL16 are present in the plasma of severe COVID-19 patients. **b** and **c:** CD8<sup>+</sup> and CD4<sup>+</sup>  
 454 CD161<sup>++</sup>CXCR6<sup>+</sup> T cell count falls (log values) as plasma concentration of CXCL16 increases, SARS-CoV-2 RT-PCR positive patients on ITU (n=10, red),  
 455 SARS-CoV-2 RT-PCR positive patients non-ITU (n=18, orange), SARS-CoV-2 RT-PCR negative non-ITU (n=10, green). on ITU (n=2, blue), line logistical  
 456 regression shown. Spearman rank correlation:  $R_s -0.44$ ,  $p < 0.01$  and  $R_s -0.38$ ,  $p < 0.1$  for CD8<sup>+</sup> and CD4<sup>+</sup> cells respectively
